# Supplementary material
Source: publisher figshare collection journal article supplement (https://karger.figshare.com/articles/dataset/_/5126506)
Supplement: Supplementary file 1 [file 000362743_sm_Table.doc]

**Supplementary Table 1.** Study outcomes according to IDWG % categories

|  | All  (*n* = 1013) | < 1.0%  (*n* = 182) | 1.0-1.9%  (*n* = 202) | 2.0-2.9%  (*n* = 223) | 3.0-3.9%  (*n* = 172) | ≥ 4.0%  (*n* = 234) |
| --- | --- | --- | --- | --- | --- | --- |
| aPrimary outcome | 104 (10.3%) | 17 (9.3%) | 16 (7.9%) | 17 (7.6%) | 22 (12.8%) | 32 (13.7%) |
| Cardiac events |  |  |  |  |  |  |
| Myocardial infarction | 27 (2.7%) | 6 (3.3%) | 5 (2.5%) | 5 (2.2%) | 4 (2.3%) | 7 (3.0%) |
| Unstable angina | 16 (1.6%) | 1 (0.5%) | 3 (1.5%) | 1 (0.4%) | 4 (2.3%) | 7 (3.0%) |
| Stable angina requiring arterial revascularization | 16 (1.6%) | 4 (2.2%) | 2 (1.0%) | 6 (2.7%) | 2 (1.2%) | 2 (0.9%) |
| New onset or worsening of congestive heart failure | 19 (1.9%) | 3 (1.7%) | 1 (0.5%) | 1 (0.4%) | 5 (2.9%) | 9 (3.8%) |
| Sudden cardiac death | 13 (1.3%) | 2 (1.1%) | 3 (1.5%) | 2 (0.9%) | 3 (1.7%) | 3 (1.3%) |
| Cerebrovascular events |  |  |  |  |  |  |
| Stroke | 13 (1.3%) | 1 (0.5%) | 2 (1.0%) | 2 (0.8%) | 4 (2.4%) | 4 (1.7%) |

aPrimary outcome: a composite of cardiac and cerebrovascular events

*Abbreviations*: IDWG, interdialytic weight gain
